# Supplementary material
Source: PubMed Central journal article supplement (PMC5612666)
Supplement: NIHMS905479-supplement-Supp_Methods.pdf [file NIHMS905479-supplement-Supp_Methods.pdf]

## Detailed genotypes

### Figure 1

**1a,e:** *y,w,ey-FLP/y,w;UAS-Ras<sup>V12</sup>, pmCh-atg8a/act>y<sup>+</sup>>GAL4, UAS-GFP; Frt82B/Frt82B, tub-GAL80*

**1b,f:** *y,w,ey-FLP/y,w;UAS-Ras<sup>V12</sup>, pmCh-atg8a/act>y<sup>+</sup>>GAL4, UAS-GFP; Frt82B, scrib<sup>2</sup>/Frt82B, tub-GAL80*

**1c:** *y,w,ey-FLP/y,w;UAS-Ras<sup>V12</sup>, pmCh-atg8a/act>y<sup>+</sup>>GAL4, UAS-GFP; Frt82B, scrib<sup>2</sup>/Frt82B, tub-GAL80, atg13<sup>Δ81</sup>*

**1g:** *y,w,ey-FLP/y,w;UAS-Ras<sup>V12</sup>, pmCh-atg8a/act>y<sup>+</sup>>GAL4, UAS-GFP; Frt82B, atg13<sup>Δ81</sup>, scrib<sup>2</sup>/Frt82B, tub-GAL80, atg13<sup>Δ81</sup>*

**1h:** *y,w,ey-FLP/y,w;UAS-Ras<sup>V12</sup>/act>y<sup>+</sup>>GAL4, UAS-GFP; Frt82B, scrib<sup>2</sup>/Frt82B, tub-GAL80*

### Figure 2

**2a:** *y,w,ey-FLP/y,w;UAS-Ras<sup>V12</sup>/act>y<sup>+</sup>>GAL4, UAS-GFP; Frt82B, scrib<sup>2</sup>/Frt82B, tub-GAL80*

**2b:** *y,w,ey-FLP/y,w;UAS-Ras<sup>V12</sup>/act>y<sup>+</sup>>GAL4, UAS-GFP; Frt82B, atg13<sup>Δ81</sup>, scrib<sup>2</sup>/Frt82B, tub-GAL80*

**2c:** *y,w,ey-FLP/y,w;UAS-Ras<sup>V12</sup>/act>y<sup>+</sup>>GAL4, UAS-GFP; Frt82B, scrib<sup>2</sup>/Frt82B, tub-GAL80, atg13<sup>Δ81</sup>*

**2d:** *y,w,ey-FLP/y,w;UAS-Ras<sup>V12</sup>/act>y<sup>+</sup>>GAL4, UAS-GFP; Frt82B, atg13<sup>Δ81</sup>, scrib<sup>2</sup>/Frt82B, tub-GAL80, atg13<sup>Δ81</sup>*

**2e:** *y,w,ey-FLP/y,w; g-atg13,UAS-Ras<sup>V12</sup>/act>y<sup>+</sup>>GAL4, UAS-GFP; Frt82B, scrib<sup>2</sup>/Frt82B, tub-GAL80, atg13<sup>Δ81</sup>*

**2g:** *y,w,ey-FLP/y,w;UAS-Ras<sup>V12</sup>/act>y<sup>+</sup>>GAL4, UAS-GFP; Frt82B, scrib<sup>2</sup>/Frt82B, tub-GAL80*

**2h:** *y,w,ey-FLP/y,w;UAS-Ras<sup>V12</sup>/act>y<sup>+</sup>>GAL4, UAS-GFP; Frt82B, scrib<sup>2</sup>/Frt82B, tub-GAL80, atg14<sup>Δ5.2</sup>*

**2i:** *y,w,ey-FLP/y,w;UAS-Ras<sup>V12</sup>/act>y<sup>+</sup>>GAL4, UAS-GFP; Frt82B, atg13<sup>Δ81</sup>, scrib<sup>2</sup>/Frt82B, tub-GAL80, atg14<sup>Δ5.2</sup>*

**2k:** *y,w,ey-FLP/y,w;UAS-Ras<sup>V12</sup>/act>y<sup>+</sup>>GAL4, UAS-GFP; Frt82B, atg13<sup>Δ81</sup>, scrib<sup>2</sup>/Frt82B, tub-GAL80, atg13<sup>Δ81</sup>*

*y,w,ey-FLP/ey3.5-atg13;UAS-Ras<sup>V12</sup>/act>y<sup>+</sup>>GAL4, UAS-GFP; Frt82B, atg13<sup>Δ81</sup>, scrib<sup>2</sup>/Frt82B, tub-GAL80, atg13<sup>Δ81</sup>*

### Figure 3

**3a:** *y,w,ey-FLP/3xCh-atg8a; UAS-Ras<sup>V12</sup>/act>y<sup>+</sup>>GAL4, UAS-GFP; Frt82B, scrib<sup>2</sup>/Frt82B tubGAL80*

**3b:** *y,w,ey-FLP/3xCh-atg8a; UAS-Ras<sup>V12</sup>, egr<sup>3</sup>/act>y<sup>+</sup>>GAL4, UAS-GFP, egr<sup>1</sup>; Frt82B, scrib<sup>1</sup>/Frt82B, tub-GAL80*

**3c:** *y,w,ey-FLP/3xCh-atg8a;UAS-Ras<sup>VI2</sup>/act>y<sup>+</sup>>GAL4, UAS-GFP; Frt82B, scrib<sup>1</sup>, UAS-bsk<sup>DN</sup>/Frt82B, tub-GAL80*

**3d:** *y,w,ey-FLP/3xCh-atg8a;UAS-Ras<sup>VI2</sup>/act>y<sup>+</sup>>GAL4, UAS-GFP; Frt82B, scrib<sup>1</sup>, kay<sup>3</sup>/Frt82B, tub-GAL80*

**3e:** *y,w,ey-FLP.N2, UAS-dicer2/3xCh-atg8a,UAS-CD8::GFP; UAS-Ras<sup>VI2</sup>, UAS-dlg<sup>RNAi</sup>/Sp; CoinFLP-GAL4/+*

**3f:** *y,w,ey-FLP.N2, UAS-dicer2/3xCh-atg8a, UAS-CD8::GFP; UAS-Ras<sup>VI2</sup>, UAS-dlg<sup>RNAi</sup>/Sp; CoinFLP-GAL4/UAS-sd- IR<sup>TRIP.JF02514</sup>*

**3g:** *y,w,ey-FLP/3xCh-atg8a; UAS-Ras<sup>VI2</sup>, UAS-upd1/act>y<sup>+</sup>>GAL4, UAS-GFP; Frt82B/Frt82B, tub-GAL80*

**3h:** *y,w,ey-FLP/3xCh-atg8a; UAS-Ras<sup>VI2</sup>, UAS- dome<sup>Δcyt2.1</sup>/act>y<sup>+</sup>>GAL4, UAS-GFP; Frt82B, scrib<sup>2</sup>/Frt82B, tub-GAL80*

**3i:** *y,w,ey-FLP/y,w;UAS-Ras<sup>VI2</sup>/act>y<sup>+</sup>>GAL4, UAS-GFP; Frt82B/Frt82B, tub-GAL80*

**3j:** *y,w,ey-FLP/y,w;UAS-Ras<sup>VI2</sup>/act>y<sup>+</sup>>GAL4, UAS-GFP; Frt82B, scrib<sup>2</sup>/Frt82B, tub-GAL80*

**3k:** *y,w,ey-FLP/UAS-bsk<sup>DN</sup>;UAS-Ras<sup>VI2</sup>/act>y<sup>+</sup>>GAL4, UAS-GFP; Frt82B, scrib<sup>2</sup>/Frt82B, tub-GAL80*

**3l:** *y,w,ey-FLP/y,w; UAS-Ras<sup>VI2</sup>, UAS- dome<sup>Δcyt2.1</sup>/act>y<sup>+</sup>>GAL4, UAS-GFP; Frt82B, scrib<sup>2</sup>/Frt82B, tub-GAL80*

#### Figure 4

**4a:** *y,w,ey-FLP.N2, UAS-dicer2/3xCh-atg8a, UAS-CD8::GFP; UAS-Ras<sup>VI2</sup>, UAS-dlg<sup>RNAi</sup>/Sp; CoinFLP-GAL4/+*

*y,w,ey-FLP.N2, UAS-dicer2/3xCh-atg8a, UAS-CD8::GFP; UAS-Ras<sup>VI2</sup>, UAS-dlg<sup>RNAi</sup>/+; CoinFLP-GAL4/UAS-slij<sup>UY681</sup>*

**4b:** Donor: *y,w,ey-FLP/y,w; UAS-Ras<sup>VI2</sup>/act>y<sup>+</sup>>GAL4, UAS-GFP; Frt82B, scrib<sup>2</sup>/Frt82B tubGAL80*

host: *w;; Frt82B (ctrl)*

**4c:** Donor: *y,w,ey-FLP/y,w;UAS-Ras<sup>VI2</sup>/act>y<sup>+</sup>>GAL4, UAS-GFP; Frt82B, atg13<sup>Δ81</sup>, scrib<sup>2</sup>/Frt82B, tub-GAL80, atg13<sup>Δ81</sup>*

host: *w;; Frt82B or w;; atg14<sup>Δ5.2</sup>/atg14<sup>EY14568</sup>*

### Extended Data Figure 1

**1a:** *ubx-FLP1, tubP-GAL4, UAS-GFP, y,w/y,w; UAS-Ras<sup>V12</sup>, pmCh-atg8a/+; Frt82B/Frt82B tubP-GAL80*

*ubx-FLP1, tubP-GAL4, UAS-GFP, y,w/y,w; UAS-Ras<sup>V12</sup>, pmCh-atg8a/+; Frt82B, scrib<sup>2</sup>/Frt82B tubP-GAL80*

**1b:** *y,w,ey-FLP/y,w;UAS-Ras<sup>V12</sup>, pmCh-atg8a/act>y<sup>+</sup>>GAL4, UAS-GFP; Frt82B/Frt82B, tub-GAL80*

*y,w,ey-FLP/y,w;UAS-Ras<sup>V12</sup>, pmCh-atg8a/ act>y<sup>+</sup>>GAL4, UAS-GFP; Frt82B, scrib<sup>2</sup>/Frt82B, tub-GAL80*

**1c:** *y,w,ey-FLP/y,w;UAS-Ras<sup>V12</sup>, pmCh-atg8a/ act>y<sup>+</sup>>GAL4, UAS-GFP; Frt82B, scrib<sup>2</sup>/Frt82B, tub-GAL80*

### Extended Data Figure 2

**2a:** *y,w,ey-FLP/y,w;UAS-Ras<sup>V12</sup>, pmCh-atg8a/ act>y<sup>+</sup>>GAL4, UAS-GFP; Frt82B/Frt82B, tub-GAL80*

*y,w,ey-FLP/y,w;UAS-Ras<sup>V12</sup>, pmCh-atg8a/ act>y<sup>+</sup>>GAL4, UAS-GFP; Frt82B, scrib<sup>2</sup>/Frt82B, tub-GAL80*

**2b:** *y,w,ey-FLP/w; UAS-Ras<sup>V12</sup>, exp::*LacZ*/ act>y<sup>+</sup>>GAL4, UAS-GFP; Frt82B scrib<sup>1</sup>/Frt82B, tub-GAL80*

### Extended Data Figure 3

**3b:** *y,w,ey-FLP/y,w;+/act>y<sup>+</sup>>GAL4, UAS-GFP; Frt82B, atg14<sup>Δ5.2</sup>/Frt82B, tub-GAL80*

**3c:** *y,w,ey-FLP/y,w;g-atg14/act>y<sup>+</sup>>GAL4, UAS-GFP; Frt82B, atg14<sup>Δ5.2</sup>/Frt82B, tub-GAL80*

**3d:** *y,w,ey-FLP/w;+/act>y<sup>+</sup>>GAL4, UAS-GFP; Frt82B/Frt82B, tub-GAL80*

**3e:** *y,w,ey-FLP/y,w;+ act>y<sup>+</sup>>GAL4, UAS-GFP; Frt82B, atg13<sup>Δ81</sup>/Frt82B, tub-GAL80*

**3f:** *y,w,ey-FLP/y,w;+/act>y<sup>+</sup>>GAL4, UAS-GFP; Frt82B, atg14<sup>Δ5.2</sup>/Frt82B, tub-GAL80*

### Extended Data Figure 4

**4b:** *y,w,ey-FLP/w;+/act>y<sup>+</sup>>GAL4, UAS-GFP; Frt82B/Frt82B, tub-GAL80, atg13<sup>Δ81</sup>*

**4c:** *y,w,ey-FLP/w;+/act>y<sup>+</sup>>GAL4, UAS-GFP; Frt82B/Frt82B, tub-GAL80, atg14<sup>Δ5.2</sup>*

### Extended Data Figure 5

**5b,d:** *y,w,ey-FLP/y,w;UAS-Ras<sup>V12</sup>/act>y<sup>+</sup>>GAL4, UAS-GFP;Frt82B, atg13<sup>Δ81</sup>, scrib<sup>2</sup>/Frt82B, tub-GAL80, atg13<sup>Δ81</sup>*

**5c,e:** *y,w,ey-FLP/y,w; g-atg13, UAS-Ras<sup>V12</sup>/act>y<sup>+</sup>>GAL4, UAS-GFP; Frt82B, atg13<sup>Δ81</sup>, scrib<sup>2</sup>/Frt82B, tub-GAL80, atg13<sup>Δ81</sup>*

**5g:** *ey3.5-atg13-GFP/Y*

**5h:** *y,w,ey-FLP/ey3.5-atg13;UAS-Ras<sup>V12</sup>/act>y<sup>+</sup>>GAL4, UAS-GFP; Frt82B, atg13<sup>Δ81</sup>, scrib<sup>2</sup>/Frt82B, tub-GAL80, atg13<sup>Δ81</sup>*

### Extended Data Figure 6

**6a,g,l,q:** *y,w,ey-FLP/y,w;UAS-Ras<sup>V12</sup>/act>y<sup>+</sup>>GAL4, UAS-GFP; Frt82B/Frt82B, tub-GAL80*

**6b,h,m,r:** *y,w,ey-FLP/y,w;UAS-Ras<sup>V12</sup>/act>y<sup>+</sup>>GAL4, UAS-GFP; Frt82B, scrib<sup>2</sup>/Frt82B, tub-GAL80*

**6c,i,n,s:** *y,w,ey-FLP/y,w;UAS-Ras<sup>V12</sup>/act>y<sup>+</sup>>GAL4, UAS-GFP; Frt82B, atg13<sup>Δ81</sup>, scrib<sup>2</sup>/Frt82B, tub-GAL80*

**6d,j,o,t:** *y,w,ey-FLP/y,w;UAS-Ras<sup>V12</sup>/act>y<sup>+</sup>>GAL4, UAS-GFP; Frt82B, scrib<sup>2</sup>/Frt82B, tub-GAL80, atg13<sup>Δ81</sup>*

**6e,k,p,u:** *y,w,ey-FLP/y,w;UAS-Ras<sup>V12</sup>/act>y<sup>+</sup>>GAL4, UAS-GFP; Frt82B, atg13<sup>Δ81</sup>, scrib<sup>2</sup>/Frt82B, tub-GAL80, atg13<sup>Δ81</sup>*

### Extended Data Figure 7

**7a:** *y,w,ey-FLP/y,w; UAS-Ras<sup>V12</sup>, pmCh-atg8a/act>y<sup>+</sup>>GAL4, UAS-GFP; Frt82B, scrib<sup>2</sup>/Frt82B tubGAL80*

*y,w,ey-FLP/UAS-bsk<sup>DN</sup>; UAS-Ras<sup>V12</sup>, pmCh-atg8a/act>y<sup>+</sup>>GAL4, UAS-GFP; Frt82B, scrib<sup>2</sup>/Frt82B tubGAL80*

**7b:** *y,w,ey-FLP/3xCh-atg8a;UAS-ets21c<sup>long-RNAi</sup>,UAS-Ras<sup>V12</sup>/act>y<sup>+</sup>>GAL4, UAS-GFP; Frt82B scrib<sup>1</sup>, UAS-fos<sup>39/19RNAi</sup>/Frt82B, tub-GAL80*

**7c:** *y,w,ey-FLP.N2, UAS-dicer2/3xCh-atg8a, UAS-CD8::*GFP*; UAS-Ras<sup>V12</sup>, UAS-dlg<sup>RNAi</sup>/+; CoinFLP-GAL4/Frt82B scrib<sup>1</sup>,UAS-bsk<sup>DN</sup>*

**7d:** *y,w,ey-FLP/3xCh-atg8a;UAS-yki<sup>S168A</sup>:GFP/Act>y<sup>+</sup>>Gal4, UAS-GFP; Frt82B/Frt82B tubGAL80*

**7e:** *y,w,ey-FLP.N2, UAS-dicer2/3xCh-atg8a, UAS-CD8::*GFP*; UAS-Ras<sup>V12</sup>, UAS-dlg<sup>RNAi</sup>/+; CoinFLP-GAL4/UAS-yki-IR<sup>TRIP.HMS00041</sup>*

**7f:** *y,w,ey-FLP.N2, UAS-dicer2/3xCh-atg8a, UAS-CD8::*GFP*, UAS-Ras<sup>V12</sup>, UAS-dlg<sup>RNAi</sup>/UAS-dpP110<sup>D945A</sup>; CoinFLP-GAL4/+*

**7g:** *y,w,ey-FLP/UAS-s.Impl2; UAS-Ras<sup>V12</sup>, pmCh-atg8a/act>y<sup>+</sup>>GAL4, UAS-GFP; Frt82B/Frt82B tubGAL80*

**7h:** *y,w,ey-FLP.N2, UAS-dicer2/3xCh-atg8a, UAS-CD8::*GFP*; UAS-Ras<sup>V12</sup>, UAS-dlg<sup>RNAi</sup>/+; CoinFLP-GAL4/UAS-Impl2<sup>RNAi</sup>*

**7i:** *y,w,ey-FLP/ upd3<sup>p[XP]d0495</sup>; UAS-Ras<sup>V12</sup>, pmCh-atg8a/act>y<sup>+</sup>>GAL4, UAS-GFP; Frt82B/Frt82B tubGAL80*

**7j:** *y,w,ey-FLP/y,w;UAS-Ras<sup>V12</sup>, pmCh-atg8a/act>y<sup>+</sup>>GAL4, UAS-GFP; Frt82B, scrib<sup>2</sup>/Frt82B, tub-GAL80, stat92E<sup>85C9</sup>*

### Extended Data Figure 8

**8a,b:** *y,w,ey-FLP/y,w; UAS-Ras<sup>V12</sup>, pmCh-atg8a/act>y<sup>+</sup>>GAL4, UAS-GFP; Frt82B, scrib<sup>2</sup>/Frt82B, tub-GAL80*

**8c:** *y,w,ey-FLP/y,w;UAS-Ras<sup>V12</sup>/act>y<sup>+</sup>>GAL4, UAS-GFP; Frt82B/Frt82B, tub-GAL80*

*y,w,ey-FLP/y,w;UAS-Ras<sup>V12</sup>/act>y<sup>+</sup>>GAL4, UAS-GFP; Frt82B, scrib<sup>2</sup>/Frt82B, tub-GAL80*

**8d,e:** *y,w,ey-FLP/y,w;UAS-Ras<sup>V12</sup>/act>y<sup>+</sup>>GAL4, UAS-GFP; Frt82B, scrib<sup>2</sup>/Frt82B, tub-GAL80*

- 8f:** *ey-FLP;act>y<sup>+</sup>>GAL4, UAS-GFP; Frt82B, tub-GAL80 (wt)*  
*y,w,ey-FLP/y,w;UAS-Ras<sup>V12</sup>/act>y<sup>+</sup>>GAL4, UAS-GFP; Frt82B, scrib<sup>2</sup>/Frt82B, tub-GAL80*
- 8g:** *ap-GAL4, UAS-GFP/+; pmCh-atg8a/+*
- 8h:** *ap-GAL4, UAS-GFP/+; pmCh-atg8a/UAS-ND75<sup>RNAi</sup>*
- 8i:** *y,w,ey-FLP/y,w; UAS-yki<sup>S168A</sup>:GFP/act>y<sup>+</sup>>GAL4, UAS-GFP; Frt82B/Frt82B tubGAL80*
- 8j:** *y,w,ey-FLP/y,w; UAS-yki<sup>S168A</sup>:GFP/act>y<sup>+</sup>>GAL4, UAS-GFP; Frt82B/Frt82B tubGAL80*  
*y,w,ey-FLP/y,w; UAS-yki<sup>S168A</sup>:GFP/act>y<sup>+</sup>>GAL4, UAS-GFP; Frt82B/Frt82B tubGAL80, atg13<sup>A81</sup>*
- 8k:** *y,w,ey-FLP1/w;+/G454, act>y<sup>+</sup>>GAL4, UAS-mmRFP; Frt82B/Frt82B, tub-GAL80*
- 8l:** *y,w,ey-FLP1/y,w;UAS-Ras<sup>V12</sup>/G454, act>y<sup>+</sup>>GAL4, UAS-mmRFP; Frt82B, scrib<sup>2</sup>/Frt82B, tub-GAL80*

### Extended Data Figure 9

**9a:** *y,w,ey-FLP.N2, UAS-dicer2/3xCh-atg8a, UAS-CD8::GFP; UAS-Ras<sup>V12</sup>, UAS-dlg<sup>RNAi</sup>/Sp; CoinFLP-Gal4/+*

*y,w,ey-FLP.N2, UAS-dicer2/3xCh-atg8a, UAS-CD8::GFP; UAS-Ras<sup>V12</sup>, UAS-dlg<sup>RNAi</sup>/+; CoinFLP-Gal4/UAS-slij<sup>UY681</sup>*

**9b:** Donor: *y,w,ey-FLP/y,w; UAS-Ras<sup>V12</sup>/act>y<sup>+</sup>>GAL4, UAS-GFP; Frt82B, scrib<sup>2</sup>/Frt82B tubGAL80*

host: *w;; Frt82B (ctrl)*

**9c:** Donor: *y,w,ey-FLP/y,w;UAS-Ras<sup>V12</sup>/act>y<sup>+</sup>>GAL4, UAS-GFP; Frt82B, scrib<sup>2</sup>/Frt82B, tub-GAL80*  
*or w1118*

Host: *pmCh-atg8a/CyO*

**9d:** Donor: *y,w,ey-FLP/y,w;UAS-Ras<sup>V12</sup>/act>y<sup>+</sup>>GAL4, UAS-GFP; Frt82B, scrib<sup>2</sup>/Frt82B, tub-GAL80*

Host: *w;; Frt82 (ctrl)*

**9e:** Donor: *y,w,ey-FLP/y,w;UAS-Ras<sup>V12</sup>/act>y<sup>+</sup>>GAL4, UAS-GFP; Frt82B, scrib<sup>2</sup>/Frt82B, tub-GAL80*

Host: *w\*/+;; atg14<sup>A5.2</sup>/atg14<sup>EY14568</sup> or w\*/+;g-atg14/+; atg14<sup>A5.2</sup>/atg14<sup>EY14568</sup>*

**9f:** Donor: *y,w,ey-FLP/y,w;UAS-Ras<sup>V12</sup>/act>y<sup>+</sup>>GAL4, UAS-GFP; Frt82B, atg13<sup>A81</sup>, scrib<sup>2</sup>/Frt82B, tub-GAL80, atg13<sup>A81</sup>*

Host: *w;; Frt82 (ctrl) or atg8<sup>d4</sup>*
